# Supplementary material for: Mobilome-driven partitions of the resistome in Salmonella
Source: PubMed Central journal article supplement (PMC10734508; doi:10.1128/msystems.00883-23), 2023-10-19

**a**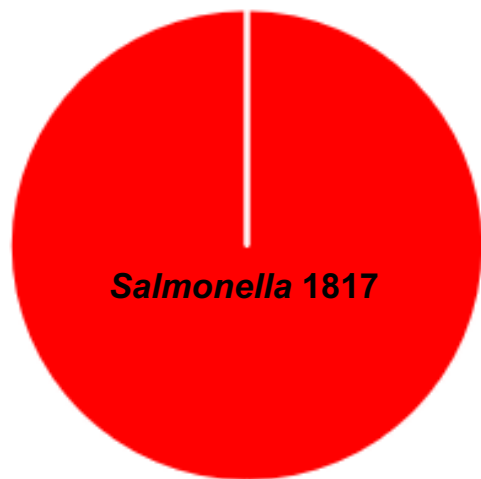**b**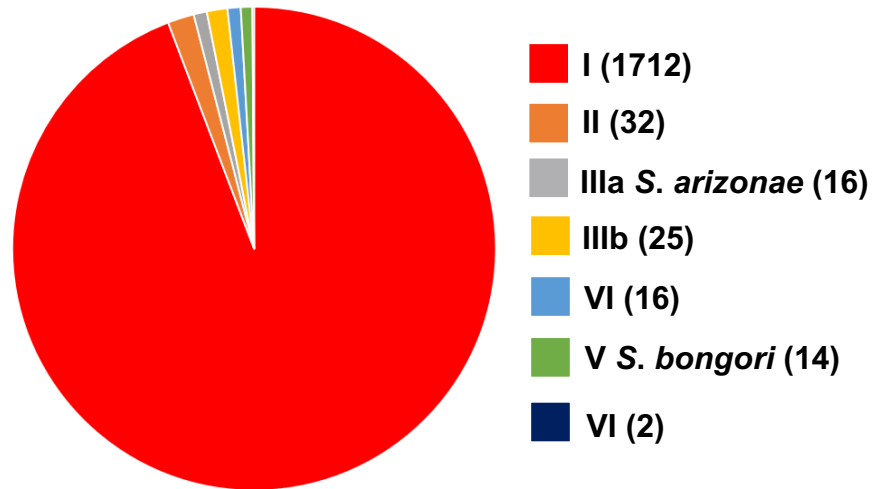**c**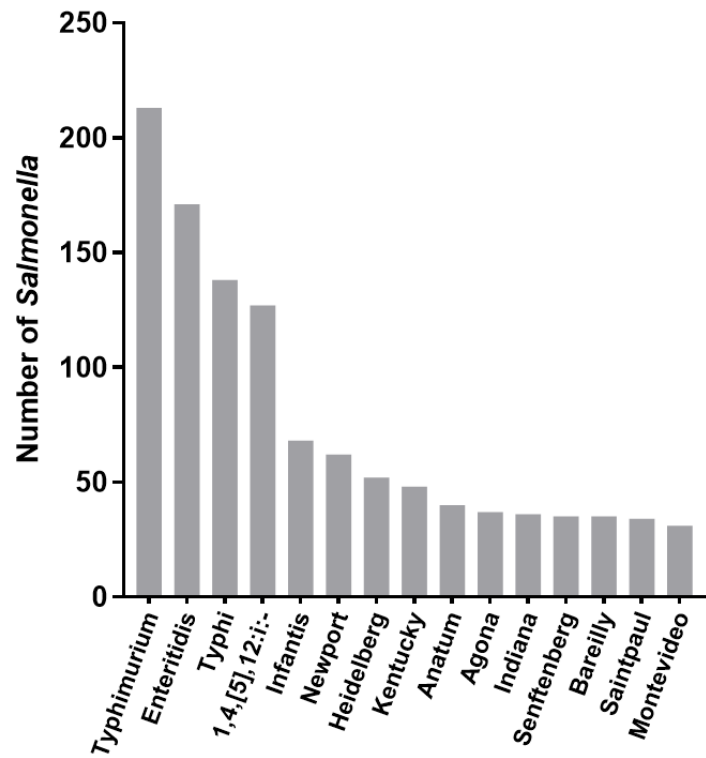**d**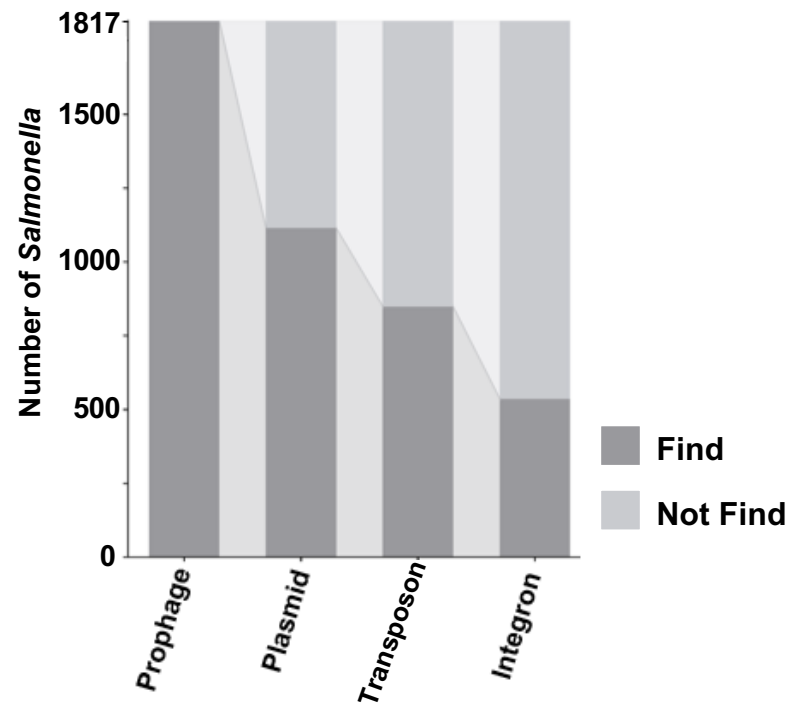

**a**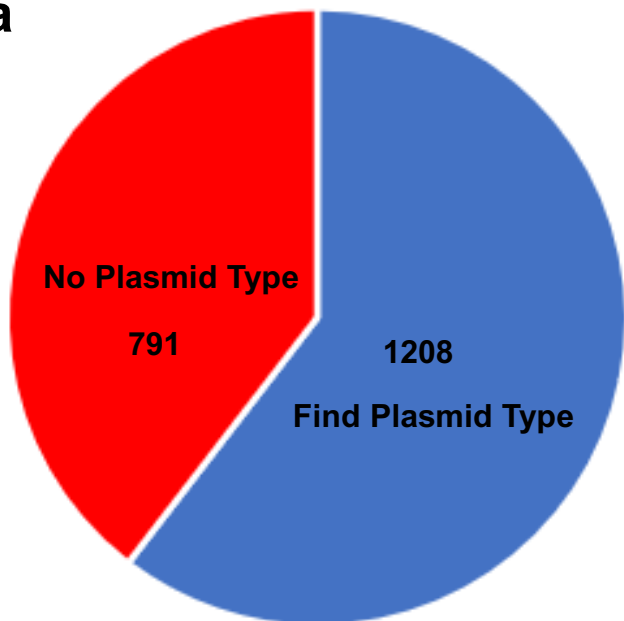**b**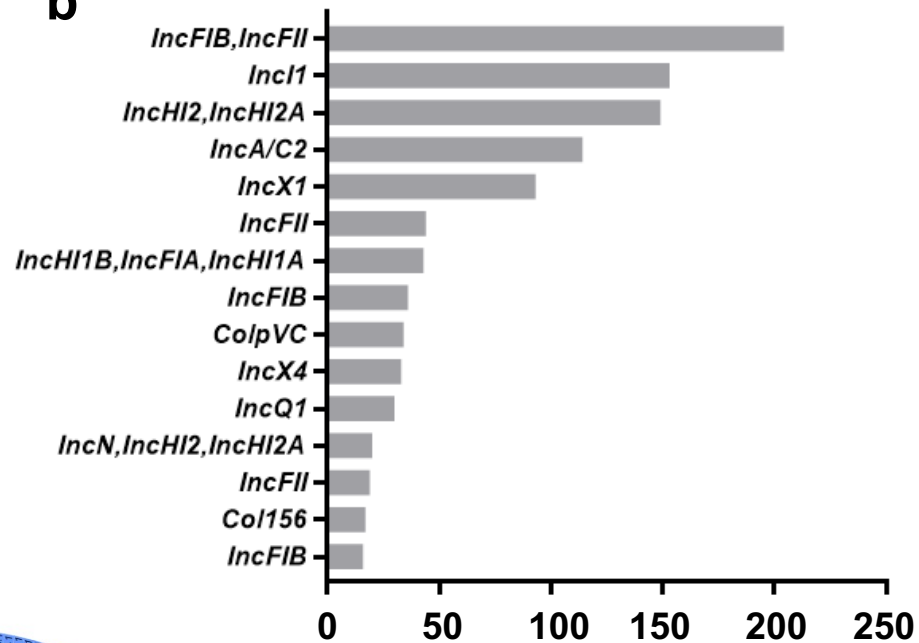**c**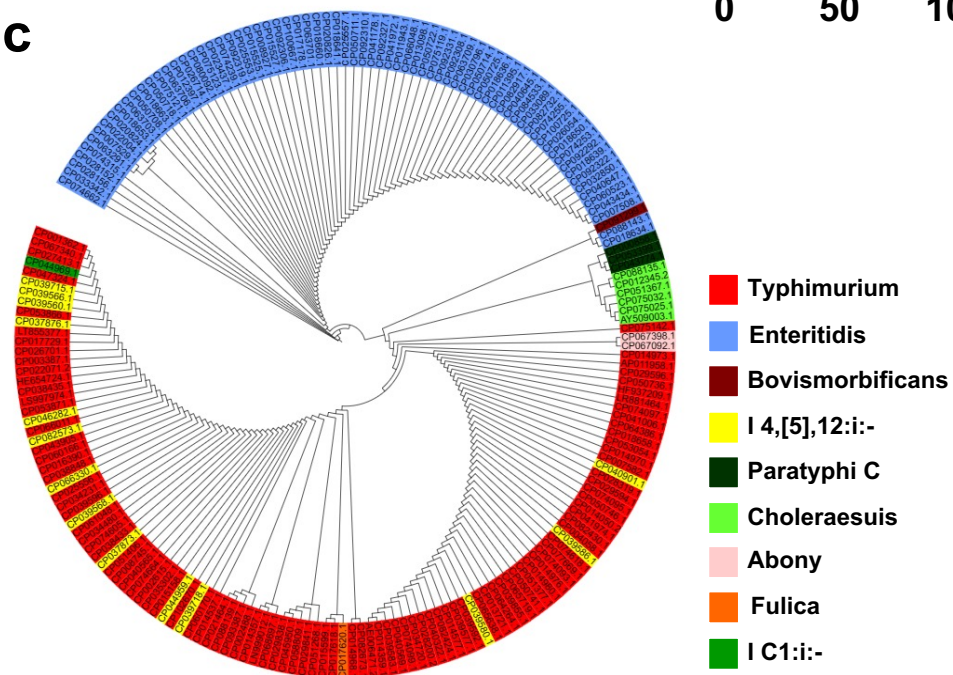

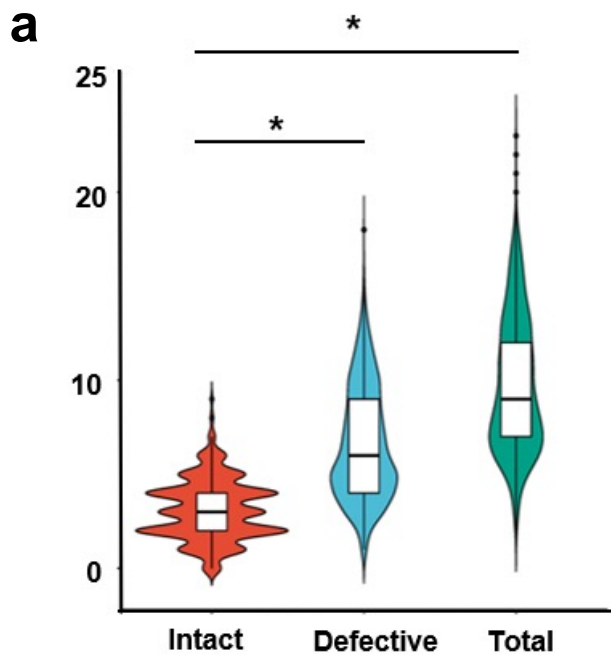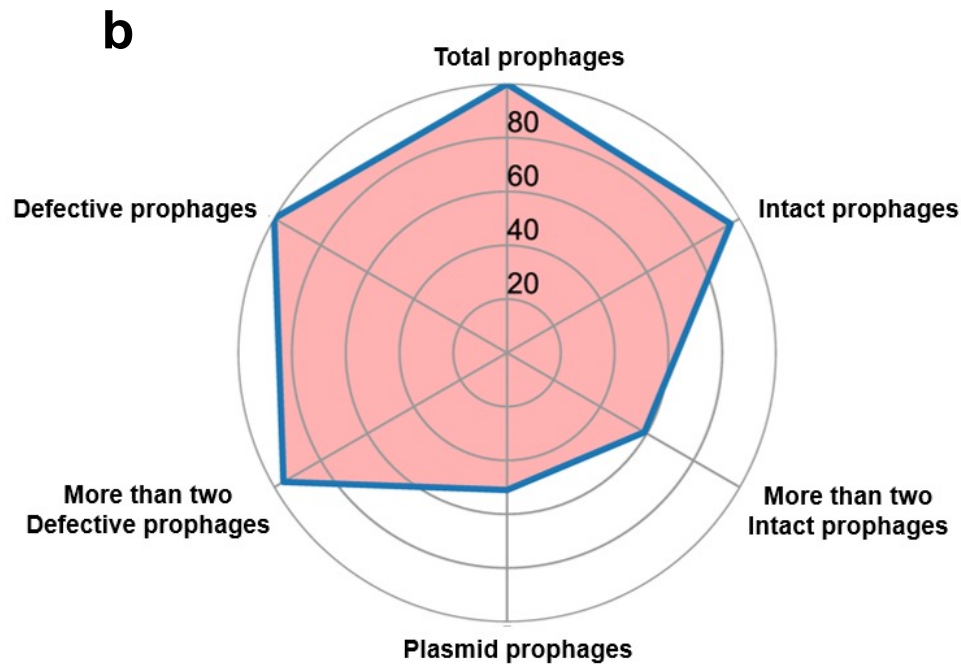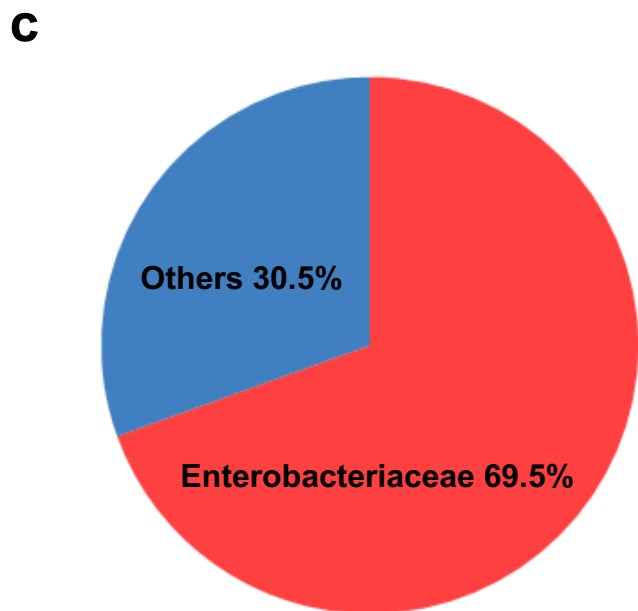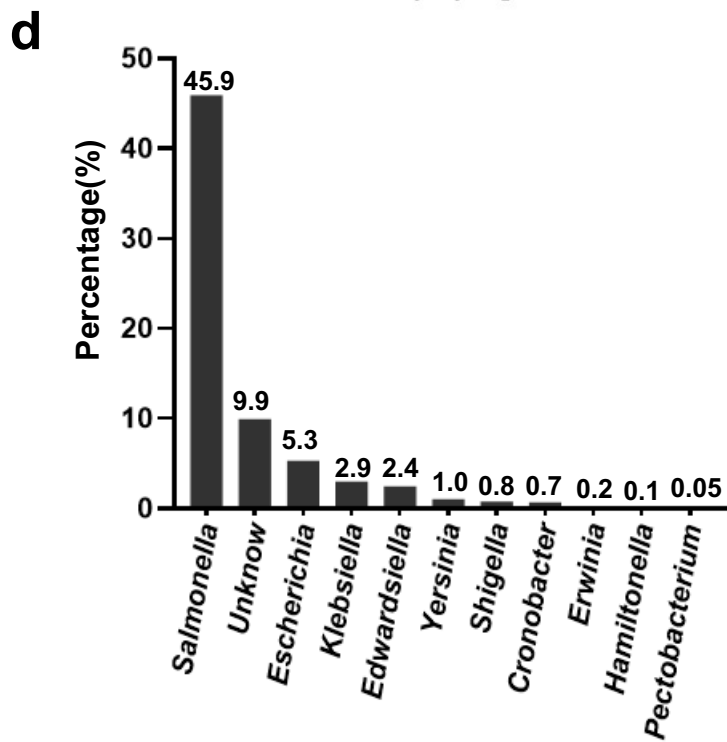

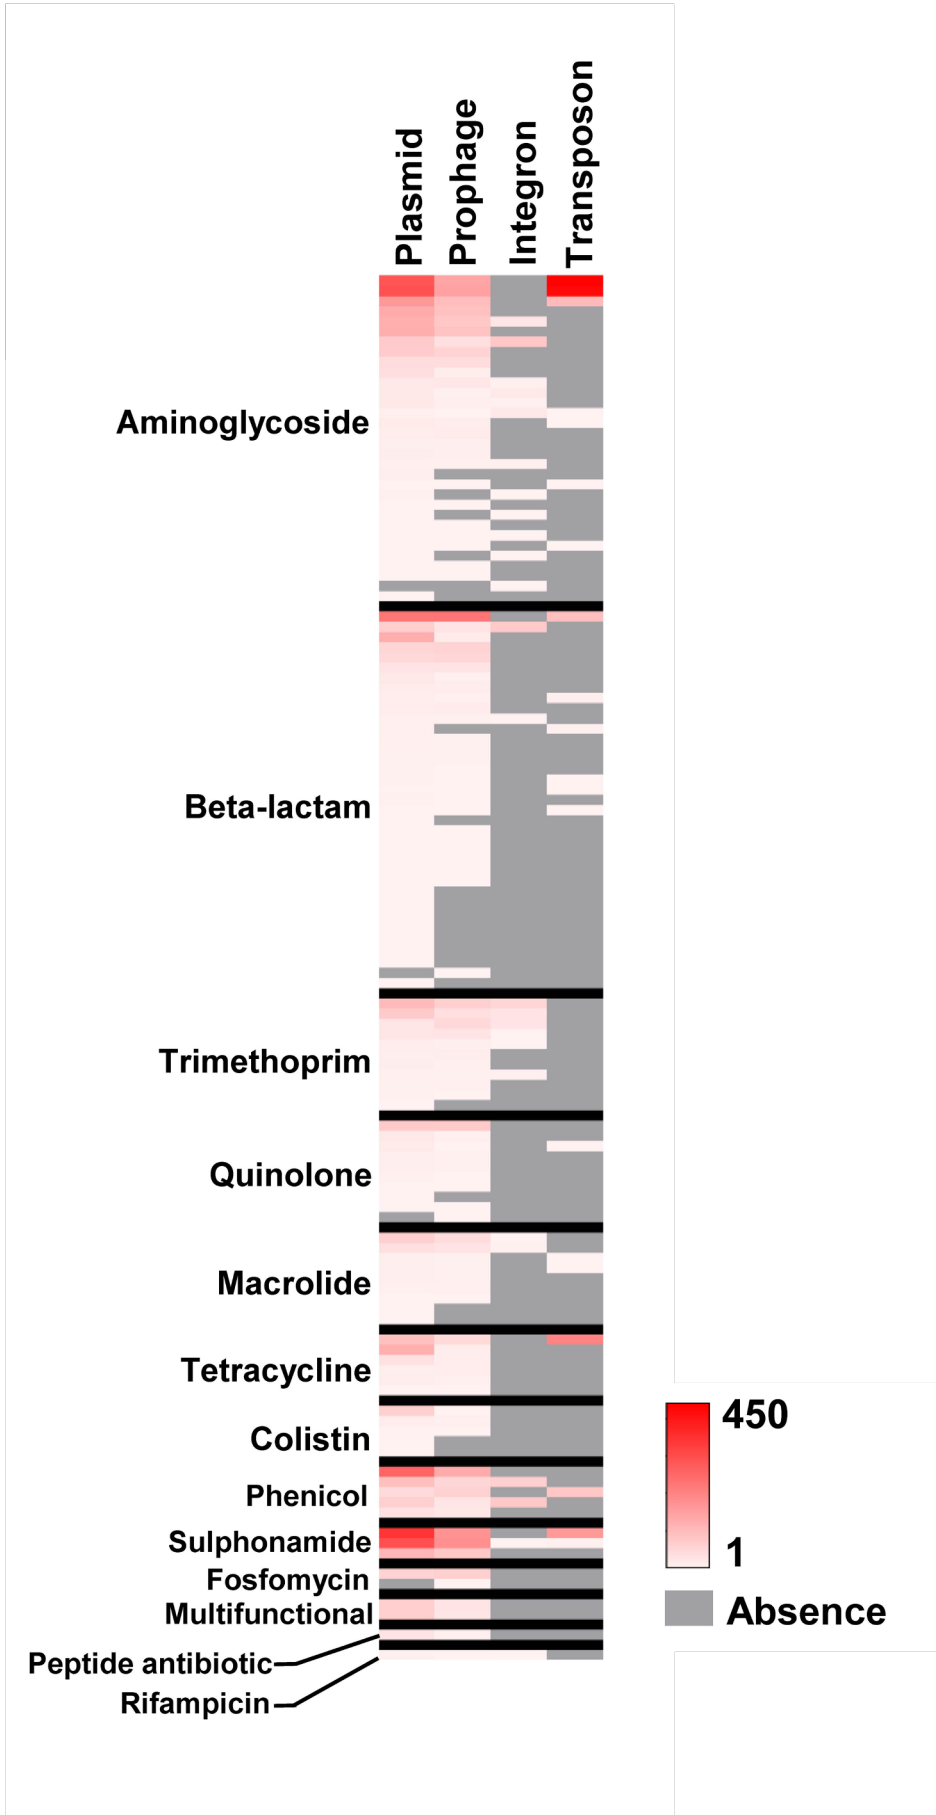

### a. Plasmid

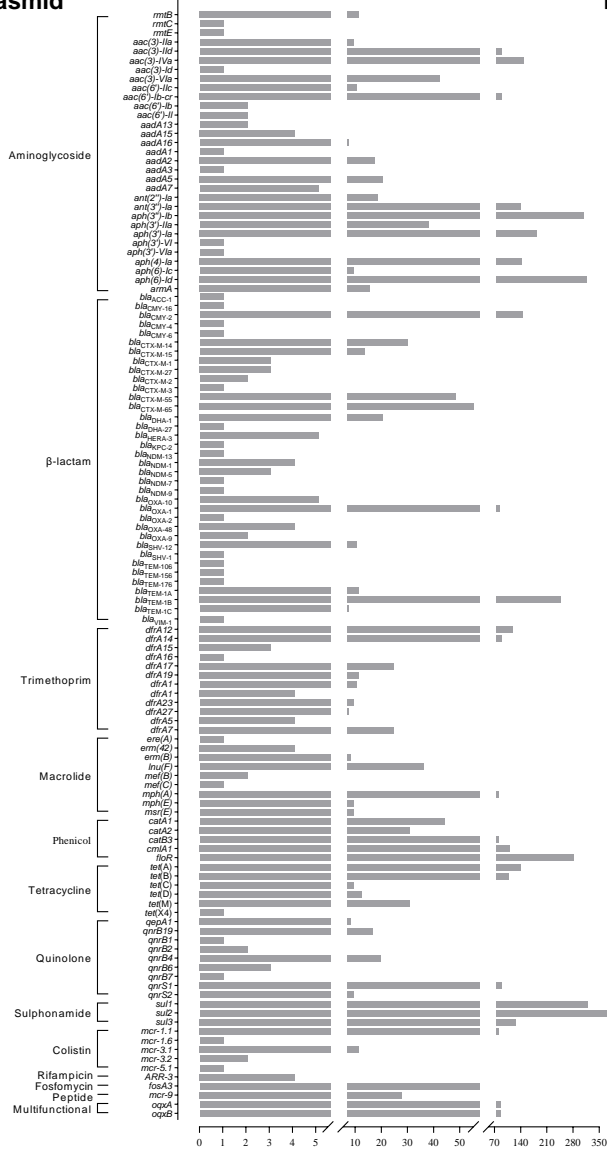

### b. Prophage

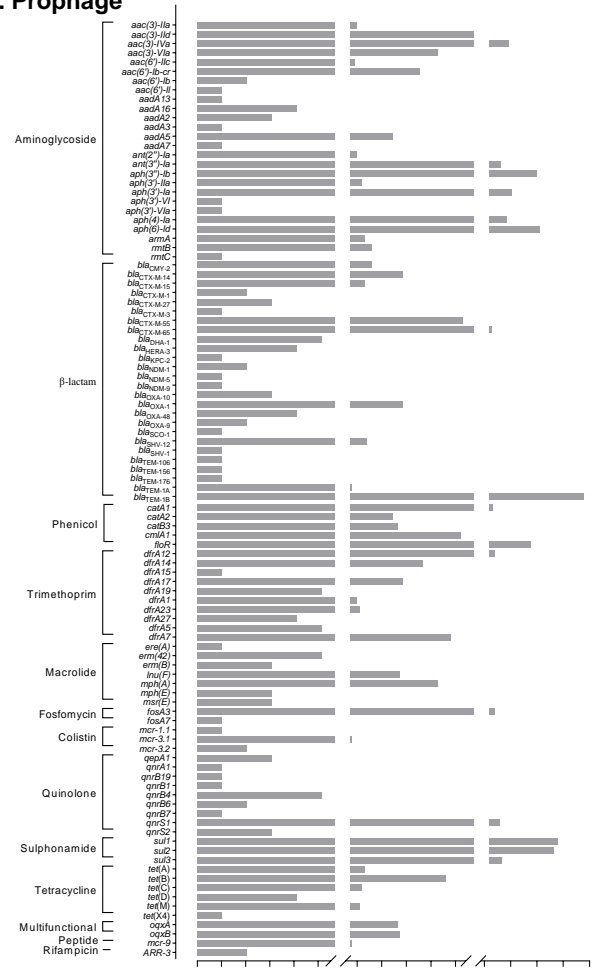

### c. Integron

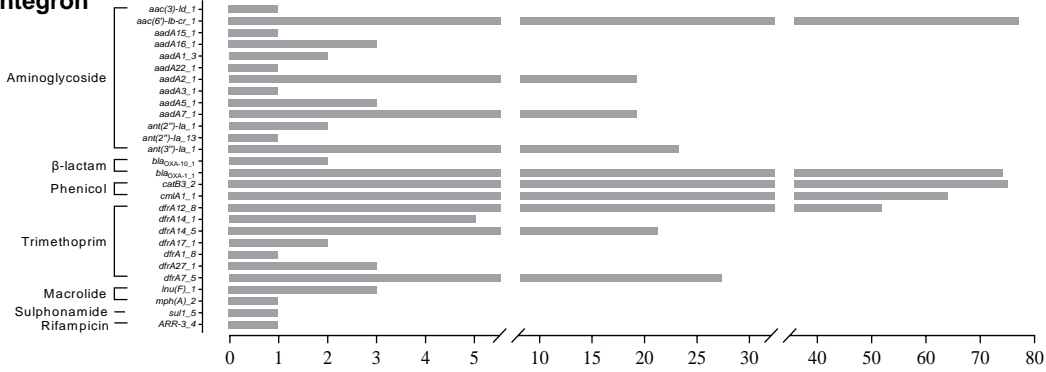

**a.**

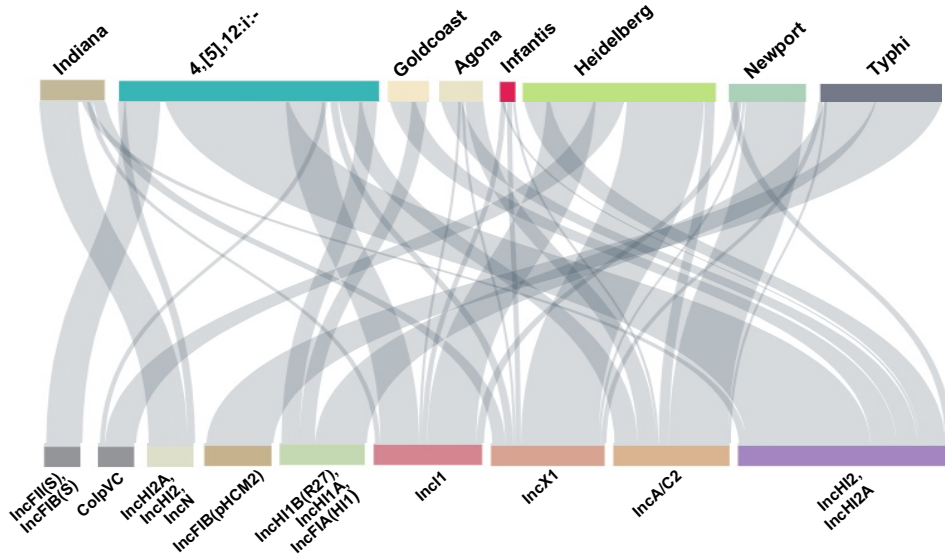

**b.**

|                                          |                |              |             |          |              |              |                 |           |           |          |            |         |            |
|------------------------------------------|----------------|--------------|-------------|----------|--------------|--------------|-----------------|-----------|-----------|----------|------------|---------|------------|
| IncHI2,<br>IncHI2A*                      | 268            | 163          | 123         | 111      | 56           | 12           | 56              | 36        | 29        | 21       | 15         | 10      | 2          |
| IncA/C2*                                 | 110            | 56           | 68          | 48       | 8            | 42           |                 | 5         | 6         | 5        |            |         |            |
| IncX1*                                   | 9              | 3            | 6           | 3        |              |              | 2               | 3         | 1         |          |            |         |            |
| IncI1*                                   | 24             | 8            | 28          | 1        | 1            |              |                 | 1         |           |          |            |         |            |
| IncHI1B(R27),<br>IncHI1A,<br>IncFIA(HI1) | 41             | 54           | 27          | 33       | 27           | 34           |                 | 1         | 7         | 2        |            |         |            |
| IncFIB(pHCM2)                            |                |              |             |          |              |              |                 |           |           |          |            |         |            |
| IncHI2A,<br>IncHI2,<br>IncN*             | 95             | 43           | 40          | 35       | 16           |              | 20              | 6         | 3         | 2        | 9          |         |            |
| ColpVC                                   |                |              |             |          |              |              |                 |           |           |          |            |         |            |
| IncFII(S),<br>IncFIB(S)                  |                |              |             |          | 1            | 1            |                 |           |           |          |            |         |            |
|                                          | Aminoglycoside | Sulphonamide | Beta-lactam | Phenicol | Trimethoprim | Tetracycline | Multifunctional | Macrolide | Quinolone | Colistin | Fosfomycin | Peptide | Rifampicin |

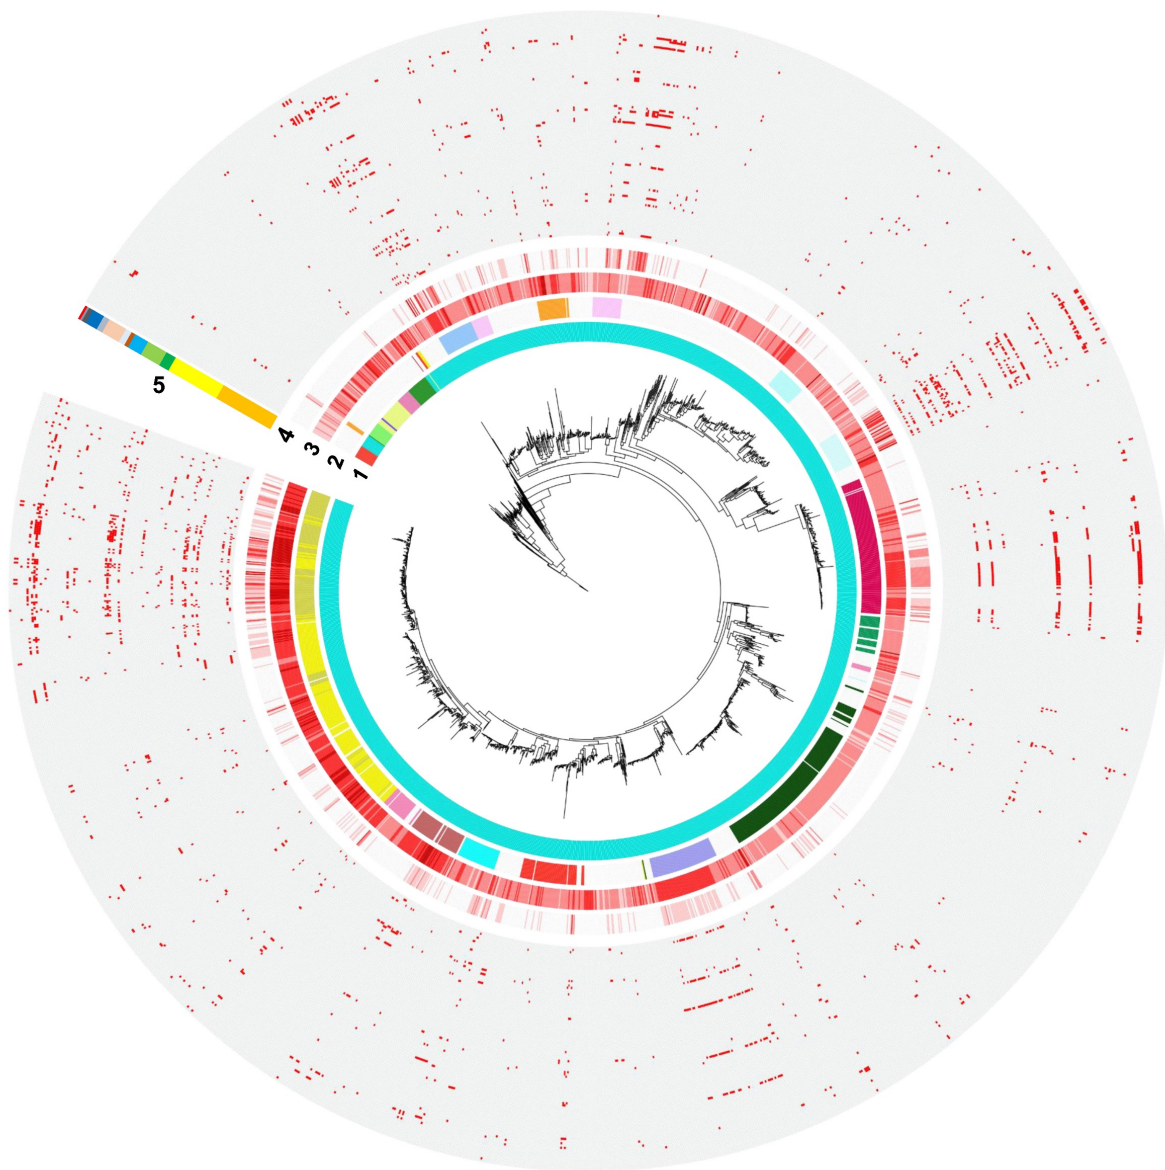

### 1. Subspecies

- I
- II
- IIIa *S. arizonae*
- IIIb
- VI
- V *S. bongori*
- VI

### 2. Top 15 serovar

- Typhimurium
- Enteritidis
- Typhi
- 1,4,[5],12:i:-
- Infantis
- Newport
- Heidelberg
- Kentucky
- Anatum
- Agona
- Indiana
- Bareilly
- Saintpaul
- Senftenberg
- Montevideo
- Others

### 3. Prophage number

- 1-5
- 6-10
- 11-15
- 16-20
- 21

### 4. ARG Carried by Prophage number

- 0
- 1-5
- 6-10
- 11-15
- 16-20
- >20

### 5. ARG Type

- Aminoglycoside
- Beta-lactam
- Trimethoprim
- Phenicol
- Macrolide
- Colistin
- Quinolone
- Sulphonamide
- Tetracycline
- Fosfomycin
- Peptide Antibiotic
- Rifampicin
- Multifunctional

**a.**

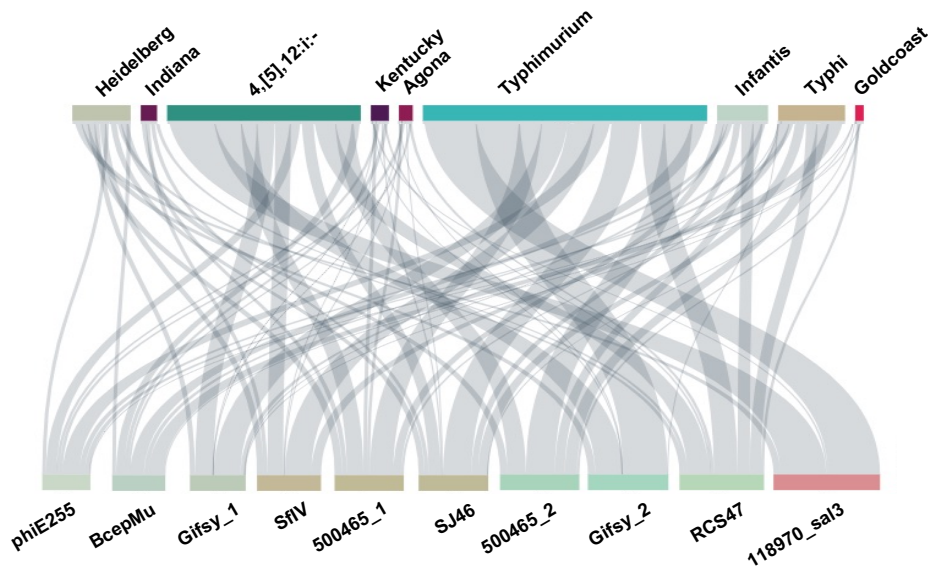

**b.**

|             |                |             |              |          |              |           |            |              |           |                 |          |            |
|-------------|----------------|-------------|--------------|----------|--------------|-----------|------------|--------------|-----------|-----------------|----------|------------|
| 118970_sal3 |                | 5           |              | 1        |              | 5         |            |              |           |                 |          |            |
| RCS47       | 292            | 193         | 144          | 84       | 66           | 43        | 25         | 33           | 24        | 15              | 3        |            |
| Gifsy_2     |                |             |              |          |              |           |            |              |           |                 |          |            |
| 500465_1    | 10             | 8           | 5            |          |              |           |            | 5            |           |                 |          |            |
| SJ46        | 173            | 120         | 75           | 62       | 32           | 15        | 32         | 5            | 15        | 20              | 4        | 2          |
| 500465_2    |                |             |              |          |              |           |            |              |           |                 |          |            |
| SfIV        |                |             |              |          |              |           |            |              |           |                 |          |            |
| Gifsy_1     | 2              | 1           | 1            |          |              |           |            |              |           |                 |          |            |
| BcepMu      |                |             |              |          |              |           |            |              |           |                 |          |            |
| phiE255     |                |             |              |          |              |           |            |              |           |                 |          |            |
|             | Aminoglycoside | Beta-lactam | Sulphonamide | Phenicol | Trimethoprim | Quinolone | Fosfomycin | Tetracycline | Macrolide | Multifunctional | Colistin | Rifampicin |





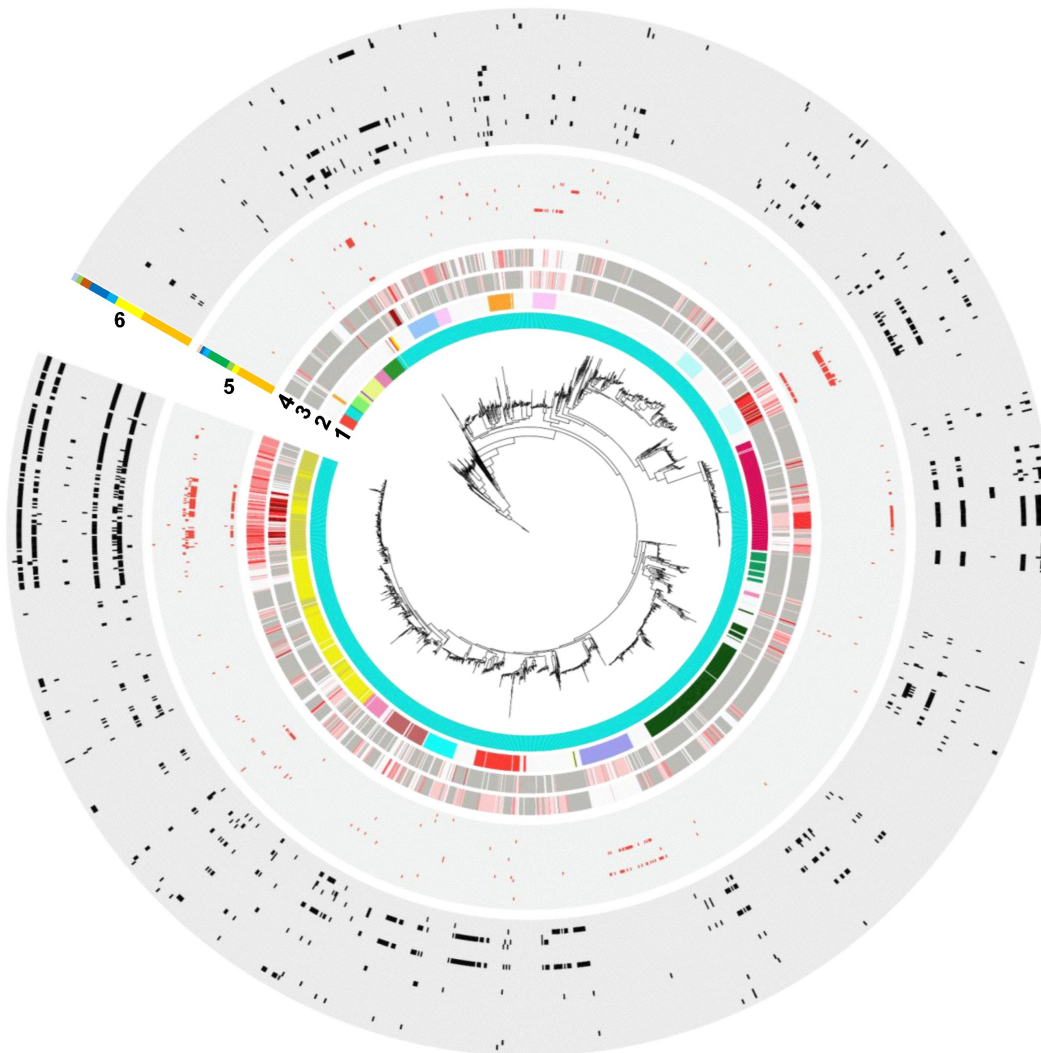

**1. Subspecies**

- I
- II
- IIIa *S. arizonae*
- IIIb
- VI
- V *S. bongori*
- VI

**2. Top 15 serovar**

- Typhimurium
- Enteritidis
- Typhi
- 1,4,[5],12:i:-
- Infantis
- Newport
- Heidelberg
- Kentucky
- Anatum
- Agona
- Indiana
- Bareilly
- Saintpaul
- Senftenberg
- Montevideo
- Others

**3. ARG Number carried by Integron**

- No Integron
- 0
- 1
- 2
- 3
- 4

**4. ARG Number carried by Transposon**

- No Transposon
- 0
- 1-2
- 3-4
- 5-6
- 7-8

**5.(Integron)-6.(Transposon) ARG Type**

- Aminoglycoside
- Beta-lactam
- Phenicol
- Trimethoprim
- Macrolide
- Sulphonamide
- Rifampicin
- Tetracycline
- Quinolone

**a**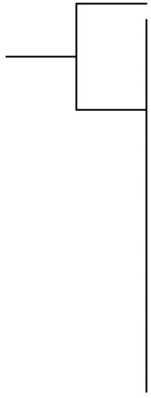**Serovar****Source****In498****aadA2****blaCARB-2****floR\_2****sul1****tet(G)**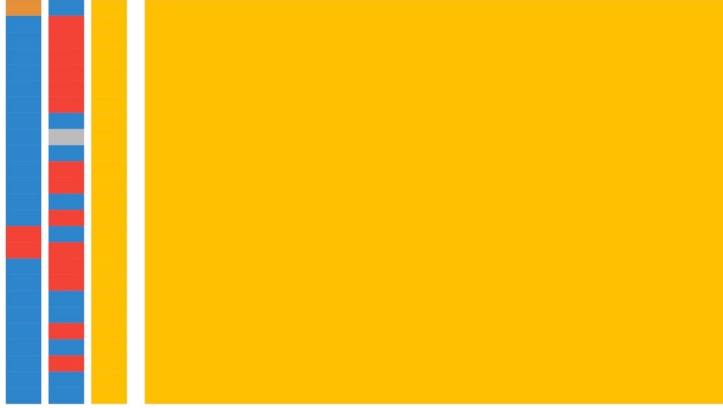**b**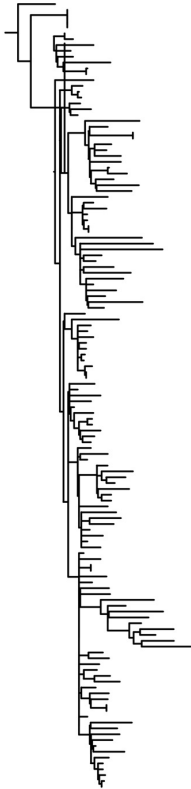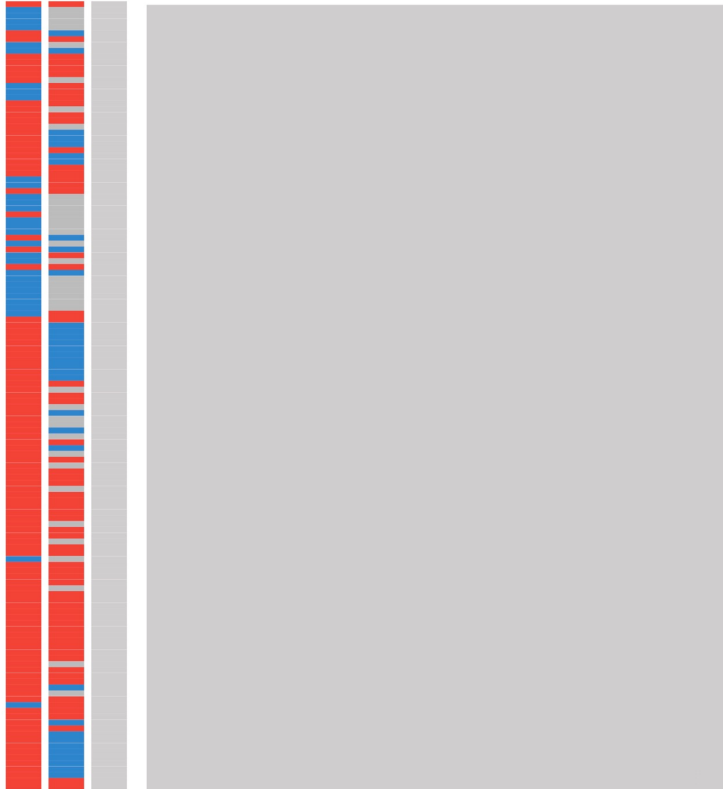**Serovar**
 I 4,[5],12: i:-

 Typhimurium

 Derby
**Source**
 Human

 Animal

 Missing

 presence

 absence

**a**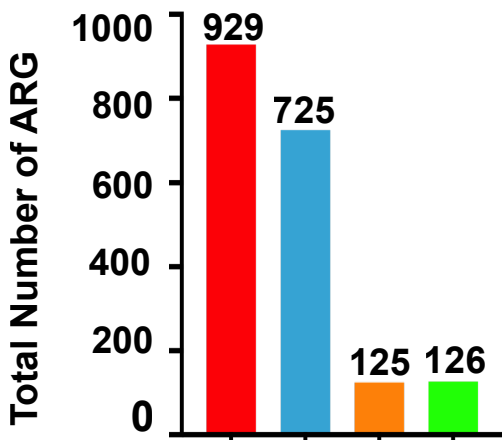**b**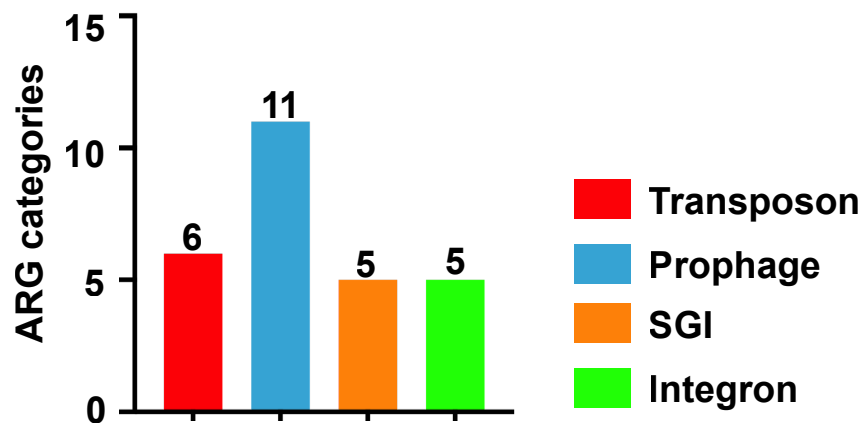**c**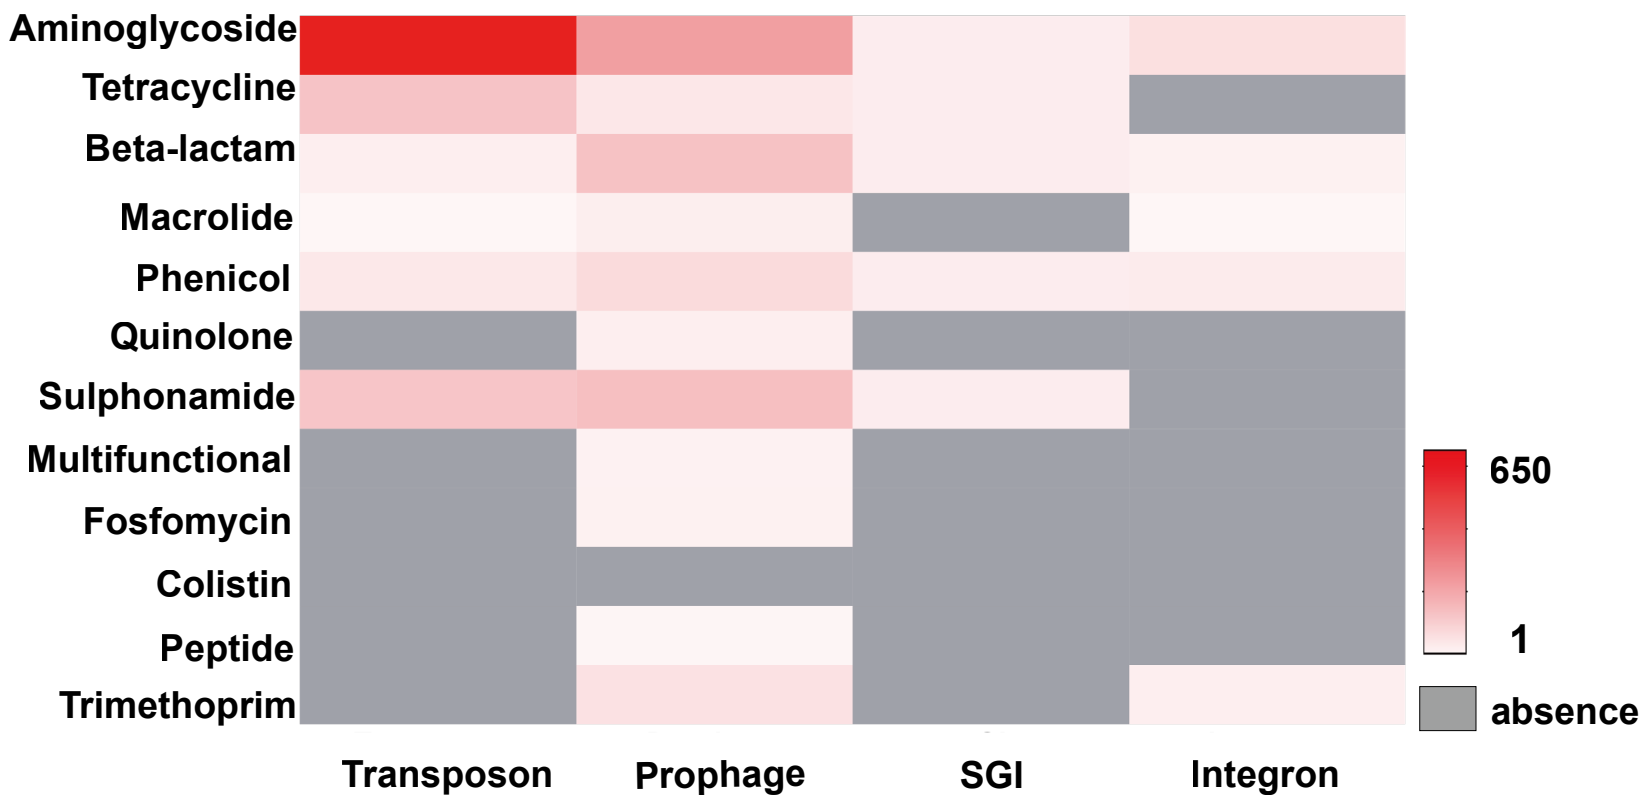



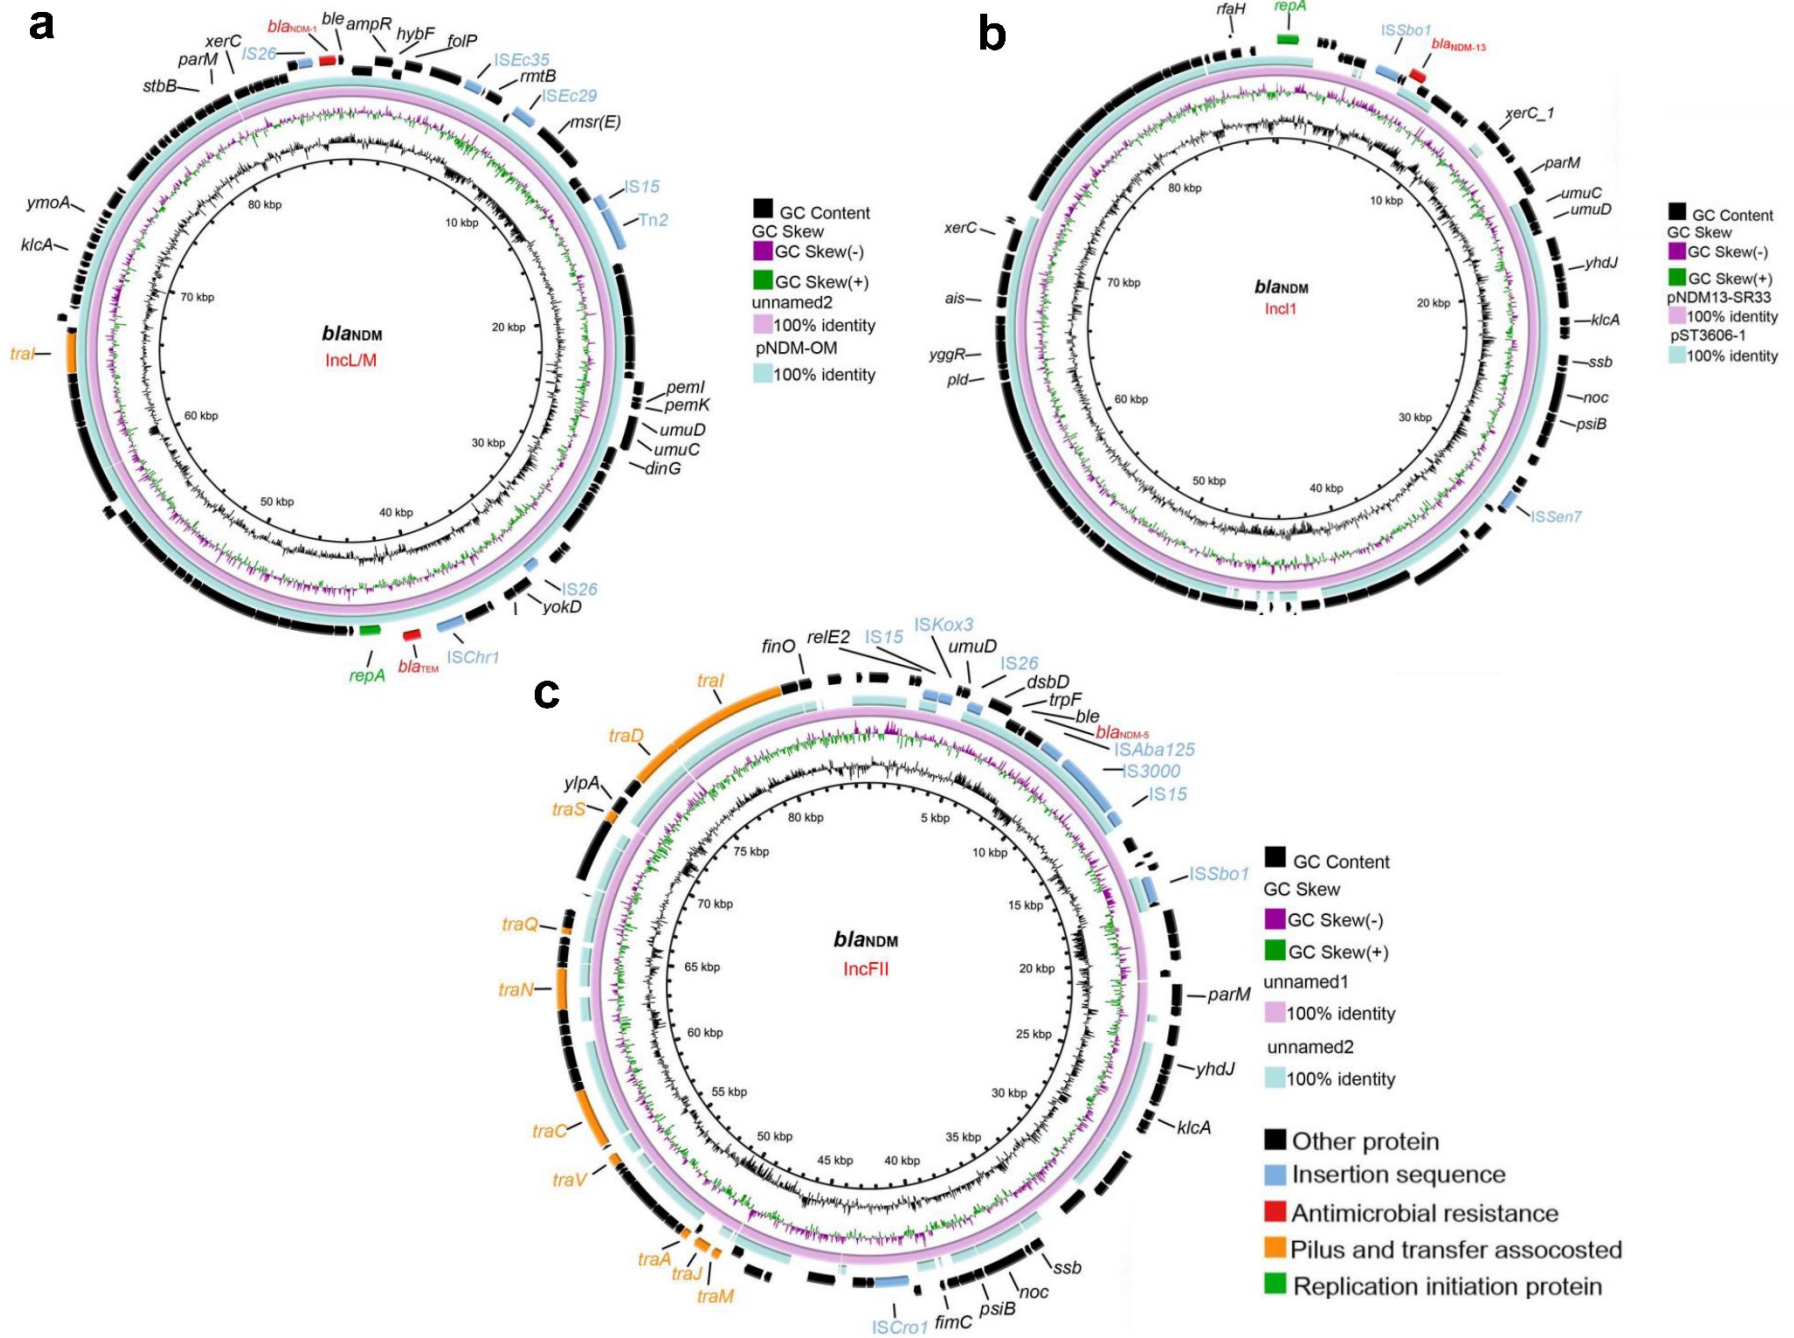

# Plasmid

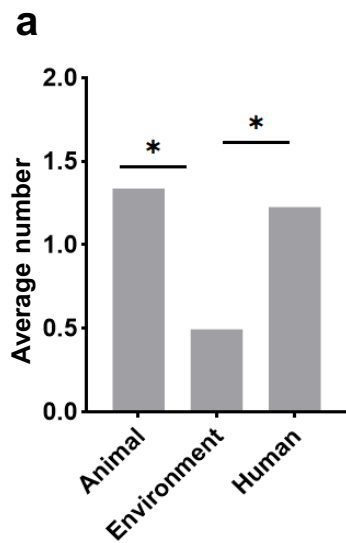

# Prophage

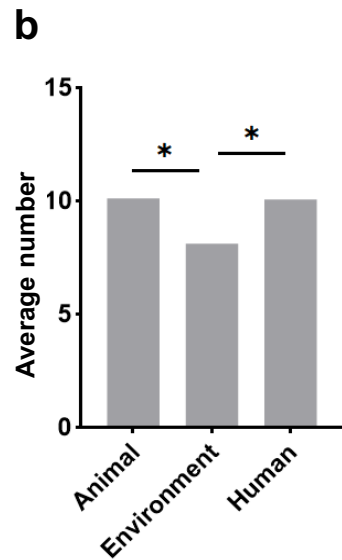

# Integron

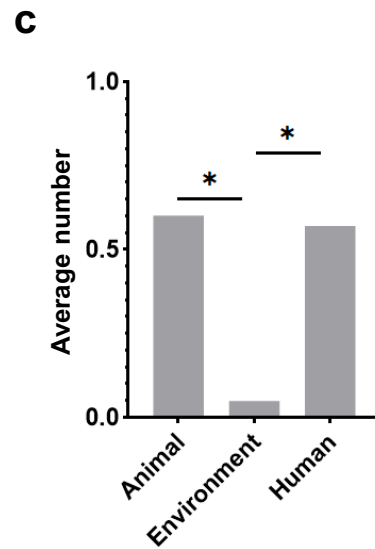

# Transposon

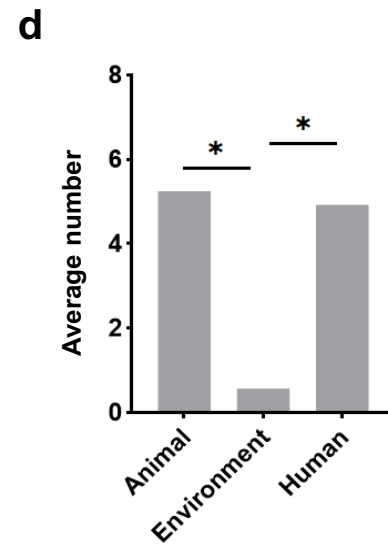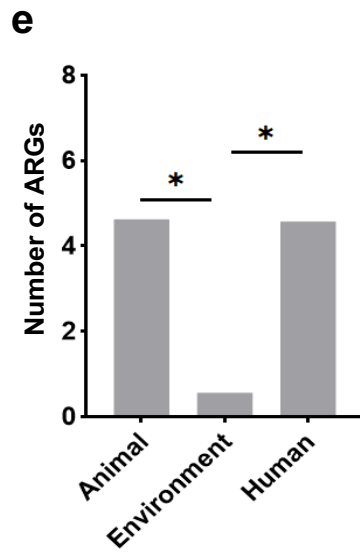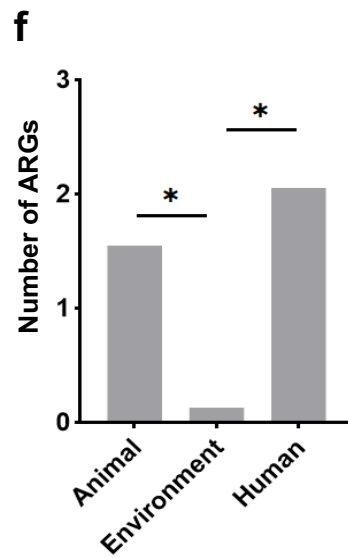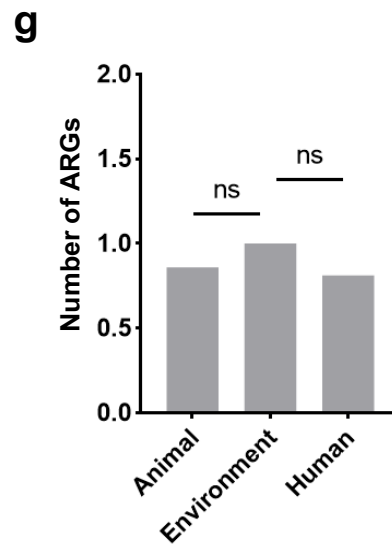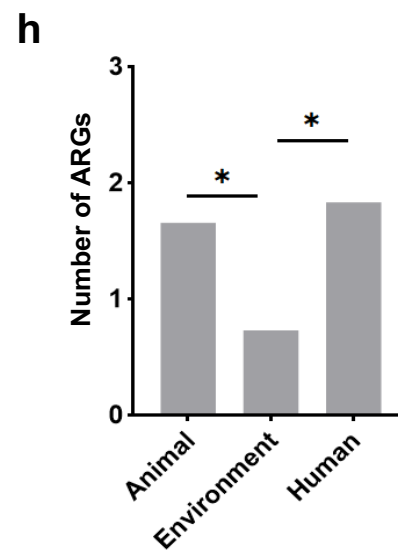

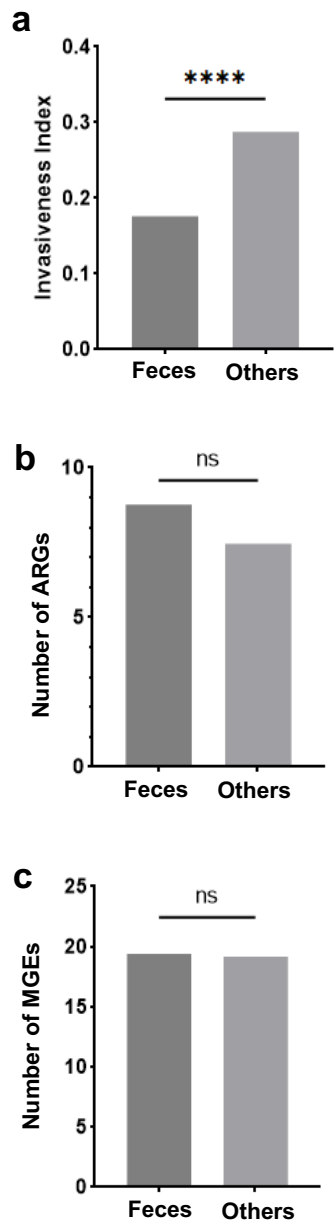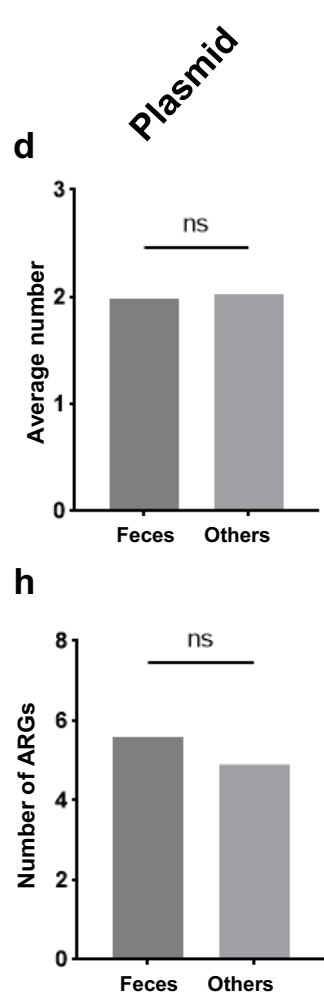

Supplement: msystems.00883-23-s0001.pdf [file msystems.00883-23-s0001.pdf]
